# Supplementary material for: The Genomes of the Fungal Plant Pathogens Cladosporium fulvum and Dothistroma septosporum Reveal Adaptation to Different Hosts and Lifestyles But Also Signatures of Common Ancestry
Source: PLoS Genet. 2012 Nov 29;8(11):e1003088. doi: 10.1371/journal.pgen.1003088 (PMC3510045; doi:10.1371/journal.pgen.1003088)
Supplement: Table S7 — Putative monoterpene-degrading genes. (XLS) [file pgen.1003088.s014.xls]

## Sheet: Putative terpene degn genes Cf 
Table S7 Putative monoterpene degradation genes
													Closest match
Query: GLEAN_6203 (CMQ_2904) Grosmannia clavigera strain SL-Kw1407 GCLVSC_144, complete sequence. FOX2 peroxisomal multifunctional beta-oxidation protein.													by phylogeny
Organism	Database	Scaffold	Protein	Start	End	Query Start	Query End	Strand	Score	E-Value	Name	% aa identity to GLEAN_6203
Cladosporium fulvum v1.0	Clafu1_GeneCatalog_proteins_20110826.aa	scf7180000130842	195512|scf7180000130842_G12562	88295	91172	85	2733	+	3524	0	GLEAN_6203	69.3
Cladosporium fulvum v1.0	Clafu1_GeneCatalog_proteins_20110826.aa	scf7180000127332	184976|scf7180000127332_G7688	134180	137120	85	2712	+	3961	0	GLEAN_6203	74.7	#
Dothistroma septosporum NZE10 v1.0	Dotse1fmaa	scaffold_5	71864|estExt_fgenesh1_kg.C_5_t10348	1098647	1101786	85	2712	+	3922	0	GLEAN_6203	67.9	#
Dothistroma septosporum NZE10 v1.0	Dotse1fmaa	scaffold_4	87983|estExt_fgenesh1_pm.C_4_t20213	2128494	2131693	85	2733	+	3468	0	GLEAN_6203	66.6
Query: GLEAN_647 (CMQ_4626) Grosmannia clavigera strain SL-Kw1407 GCLVSC_97, complete sequence. hydratase
Organism	Database	Scaffold	Protein	Start	End	Query Start	Query End	Strand	Score	E-Value	Name	% aa identity
Cladosporium fulvum v1.0	Clafu1_GeneCatalog_proteins_20110826.aa	scf7180000129586	187832|scf7180000129586_G4940	22277	23196	88	867	+	921	3.34e-119	GLEAN_647	76.7	#
Cladosporium fulvum v1.0	Clafu1_GeneCatalog_proteins_20110826.aa	scf7180000130071	188609|scf7180000130071_G3995	11996	12915	118	867	+	373	5.36e-34	GLEAN_647	46.6
Cladosporium fulvum v1.0	Clafu1_GeneCatalog_proteins_20110826.aa	scf7180000127310	184818|scf7180000127310_G12238	42662	43510	100	867	+	377	2.28e-33	GLEAN_647	44.6
Dothistroma septosporum NZE10 v1.0	Dotse1fmaa	scaffold_8	156340|estExt_Genewise1.C_8_t20091	800152	801696	88	867	+	919	5.3e-119	GLEAN_647	76.7	#
Dothistroma septosporum NZE10 v1.0	Dotse1fmaa	scaffold_9	74183|estExt_fgenesh1_kg.C_9_t10083	269941	271251	118	867	+	385	1.08e-35	GLEAN_647	46.6
Query: GLEAN_8030 (CMQ_4184) Grosmannia clavigera strain SL-Kw1407 GCLVSC_113, complete sequence. Drug resistance transporter - functionally confirmed*.
Organism	Database	Scaffold	Protein	Start	End	Query Start	Query End	Strand	Score	E-Value	Name	% aa identity
Cladosporium fulvum v1.0	Clafu1_GeneCatalog_proteins_20110826.aa	scf7180000130437	191755|scf7180000130437_G6621	55336	60159	178	4332	+	3518	0	GLEAN_8030	63.3	#
Cladosporium fulvum v1.0	Clafu1_GeneCatalog_proteins_20110826.aa	scf7180000130411	191355|scf7180000130411_G6092	27612	32352	448	4359	+	3498	0	GLEAN_8030	60.6
Cladosporium fulvum v1.0	Clafu1_GeneCatalog_proteins_20110826.aa	scf7180000130799	195153|scf7180000130799_G12372	137667	142427	409	4323	+	2350	0	GLEAN_8030	49.3
Cladosporium fulvum v1.0	Clafu1_GeneCatalog_proteins_20110826.aa	scf7180000127350	185034|scf7180000127350_G8043	84973	89599	448	4290	+	2291	0	GLEAN_8030	50.2
Cladosporium fulvum v1.0	Clafu1_GeneCatalog_proteins_20110826.aa	scf7180000130099	188825|scf7180000130099_G8073	107017	111586	442	4290	+	2462	0	GLEAN_8030	50.1
Cladosporium fulvum v1.0	Clafu1_GeneCatalog_proteins_20110826.aa	scf7180000130907	196292|scf7180000130907_G9146	26886	31272	385	4230	+	2106	0	GLEAN_8030	49.9
Dothistroma septosporum NZE10 v1.0	Dotse1fmaa	scaffold_5	129473|e_gw1.5.208.1	2357967	2362570	193	4332	+	3988	0	GLEAN_8030	67.9	#
Dothistroma septosporum NZE10 v1.0	Dotse1fmaa	scaffold_10	74963|estExt_fgenesh1_kg.C_100391	1467329	1473131	448	4359	+	3434	0	GLEAN_8030	59.6
Dothistroma septosporum NZE10 v1.0	Dotse1fmaa	scaffold_6	72510|estExt_fgenesh1_kg.C_6_t10214	795135	800174	448	4290	+	2299	0	GLEAN_8030	50.7
Dothistroma septosporum NZE10 v1.0	Dotse1fmaa	scaffold_3	168452|estExt_Genewise1Plus.C_3_t10451	718321	723333	409	4323	+	2331	0	GLEAN_8030	49.5
Dothistroma septosporum NZE10 v1.0	Dotse1fmaa	scaffold_13	75766|estExt_fgenesh1_kg.C_130082	271146	275886	205	4230	+	2148	0	GLEAN_8030	49.9
BLASTX to Dotse1 or Clafu1 filtered gene models.
Only sequences with at least 40% amino acid identity to the query G. clavigera sequence (computed by full sequence alignments) are shown.
*DiGuistini, S. et al. Genome and transcriptome analyses of the mountain pine beetle-fungal symbiont Grosmannia clavigera, a lodgepole pine pathogen. Proceedings of the National Academy of Sciences of the United States of America 108, 2504-2509 (2011).
# denotes closest match to G. clavigera query.
